# Supplementary material for: Estimating the avoidable burden of certain modifiable risk factors in osteoporotic hip fracture using Generalized Impact Fraction (GIF) model in Iran
Source: PubMed Central journal article supplement (PMC3598997; doi:10.1186/2251-6581-12-10), 2013-01-30

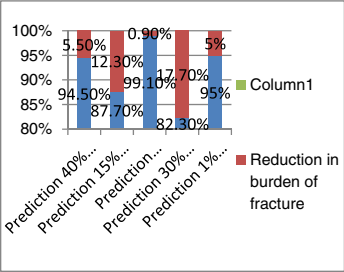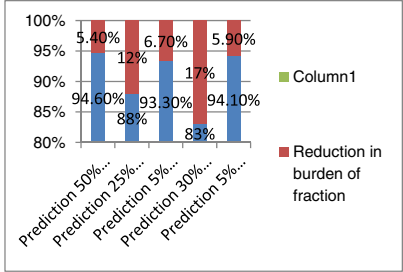

Supplement: 40200_2012_38_MOESM4_ESM.pdf [file 40200_2012_38_MOESM4_ESM.pdf]
